# Supplementary material
Source: PubMed Central journal article supplement (PMC2971593)
Supplement: pp.110.157784_1.pdf [file pp.110.157784_1.pdf]

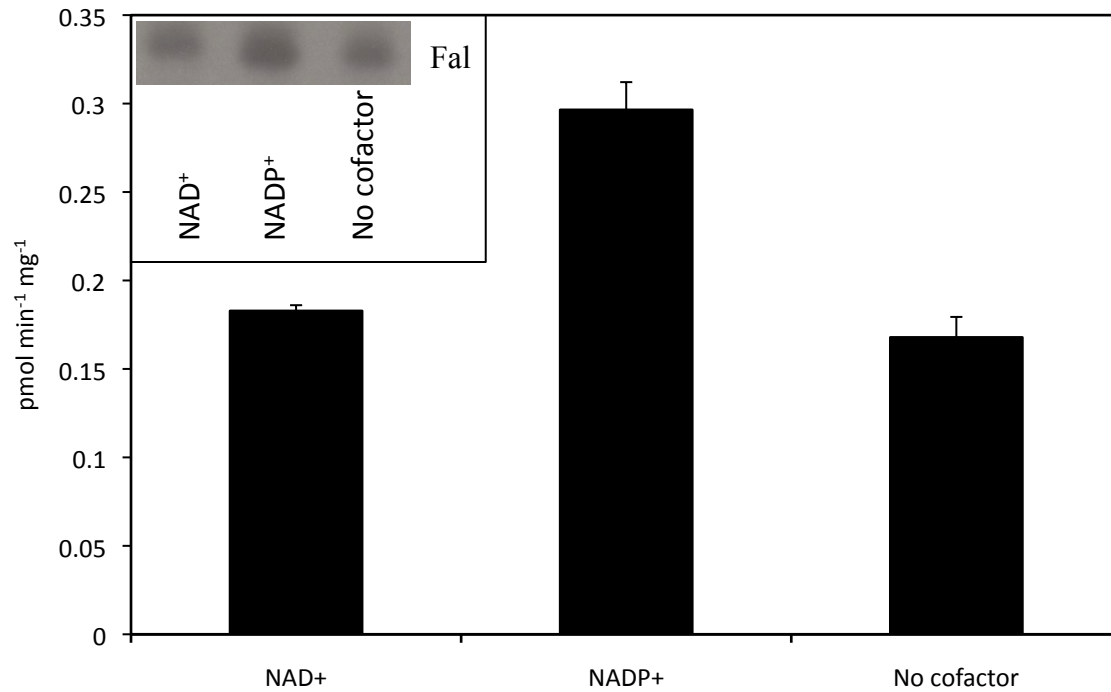

**Supplemental Data Figure 1.** *Arabidopsis* membranes contain sufficient cofactor to support farnesol dehydrogenase activity. To determine if sufficient cofactor is present in *Arabidopsis* membranes to support farnesol dehydrogenase activity, assays were performed using Col-0 membranes in the presence of 0.2 mM NAD<sup>+</sup>, 0.2 mM NADP<sup>+</sup> or no added cofactor. The standard error of the mean is shown. Fal, farnesol.

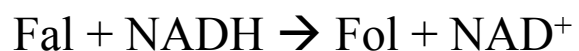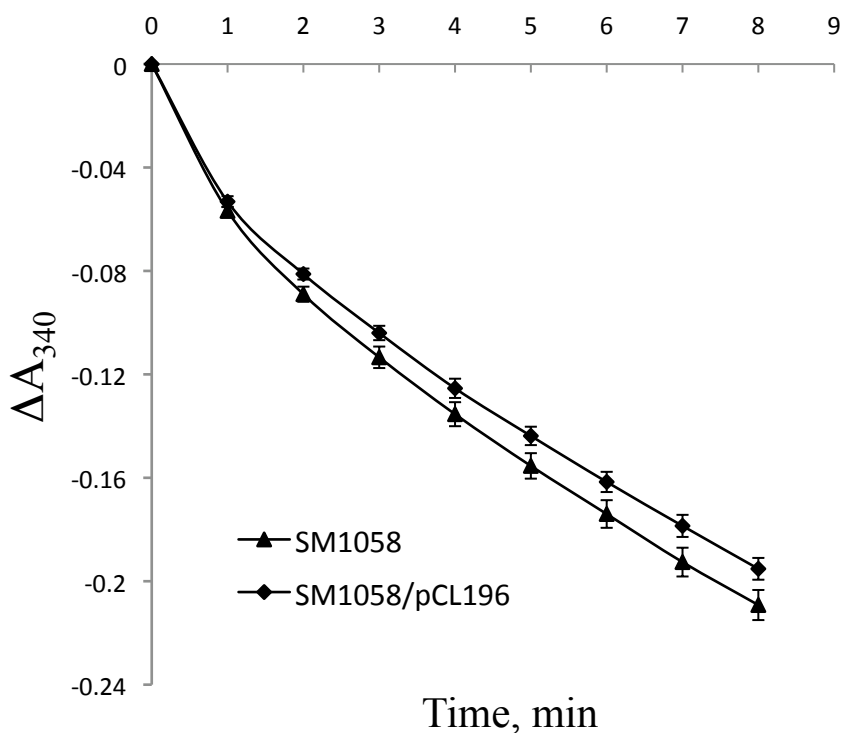

**Supplemental Data Figure 2.** *The FLDH-encoded farnesol dehydrogenase is not a farnesal reductase.* Farnesal reductase reactions were performed using SM1058 or SM1058/pCL196 membranes in the presence of 1 mM farnesal and 0.1 mM NADH and oxidation of NADH was detected spectrophotometrically at 340 nm as a function of time. These data are representative of two independent experiments. The standard error of the mean is shown. No significant differences were observed between SM1058 and SM1058/pCL196 membranes, as judged by student's *t* test.

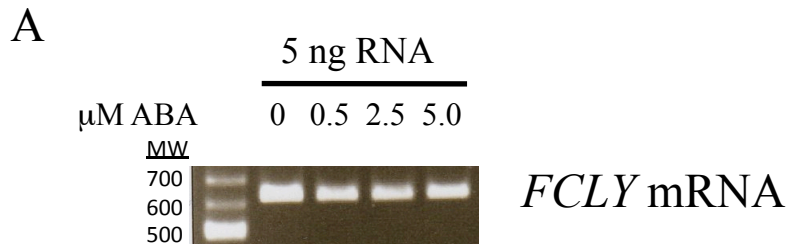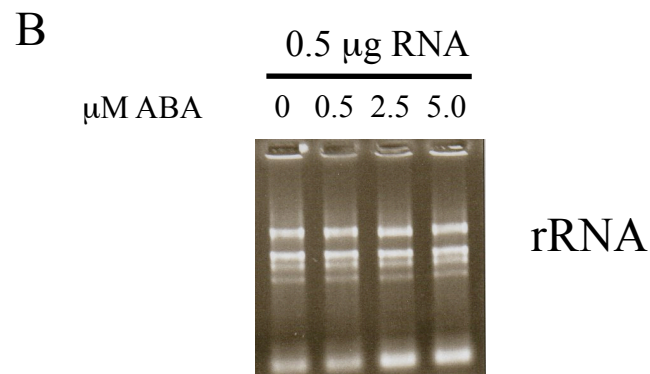

**Supplemental Data Figure 3.** *FCLY* is negatively regulated by ABA. A, RT-PCR was performed on 5 ng of total RNA from wild type (Col) seedlings, which were grown for four days on 0.5X Murashige-Skoog plates containing 1.0% sucrose and 0.8% agar and then transferred to identical plates containing 0, 0.5, 2.5, or 5.0  $\mu\text{M cisABA}$  for 16 hours. The *FCLY* RT-PCR product was expected to be 633 bp in length. B, Ribosomal RNA is shown for the RNA samples used in A.

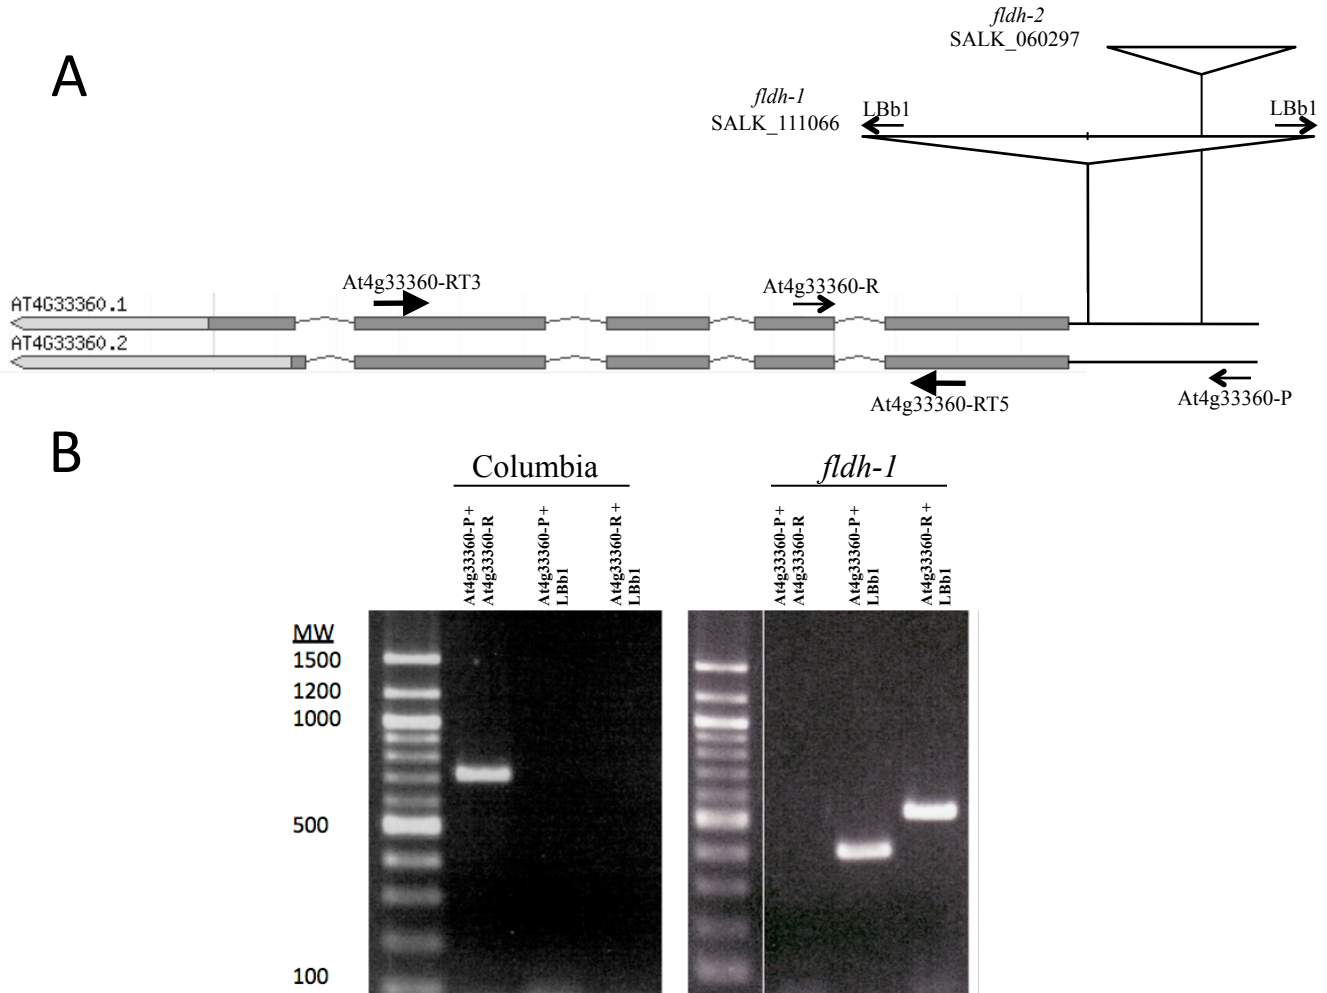

**Supplemental Data Figure 4.** Molecular characterization of *fdh* mutants of *Arabidopsis*. A, Locations of SALK\_111066 (*fdh-1*) and SALK\_060297 (*fdh-2*) T-DNA insertions and primer binding sites are shown. B, Genomic PCR using the indicated primers identified a homozygous *fdh-1* mutant (*fdh-2* was identified as a homozygous T-DNA line at the Salk Institute Genomic Analysis Laboratory).
